# Supplementary material for: Hierarchically porous, biaxially woven carbon nanotube sheet arrays for next-generation anion-exchange membrane water electrolyzers
Source: Royal Society of Chemistry journal article supplement (doi:10.1039/d2ta04526e), 2022-01-01
Supplement: d2ta04526e1.pdf [file d2ta04526e1.pdf]

Supplementary Information

# **Hierarchically Porous, Biaxially Woven Carbon Nanotube Sheet Arrays for Next-Generation Anion-Exchange Membrane Water Electrolyzers**

Ji Eun Park<sup>a</sup>, Yung-Eun Sung<sup>b,c\*</sup>, Changsoon Choi<sup>a\*</sup>

<sup>a</sup>Department of Energy and Materials Engineering, Dongguk University, Seoul 04620, Republic of Korea

<sup>b</sup>Center for Nanoparticle Research, Institute for Basic Science (IBS), Seoul 08826, Republic of Korea

<sup>c</sup>School of Chemical and Biological Engineering, Seoul National University, Seoul 08826, Republic of Korea

## **Corresponding Authors**

\*E-mail: [ysung@snu.ac.kr](mailto:ysung@snu.ac.kr) (Y.-E. Sung) and [cschoi84@dongguk.edu](mailto:cschoi84@dongguk.edu) (C. Choi),

Table S1. Comparison of ohmic, charge-transfer, and mass transport resistances of four

| Sample name              | Ohmic resistance | Charge-transfer resistance | Mass transport resistance |
|--------------------------|------------------|----------------------------|---------------------------|
| NiFeO <sub>x</sub> _CNTS | 65               | 177                        | 0.112                     |
| NiFeO <sub>x</sub> _NP   | 126              | 495                        | 0.228                     |
| Pt_CNTS                  | 75               | 12.0                       | 0.06                      |
| Pt_NP                    | 99               | 12.5                       | 0.2                       |

AEMWEs obtained using the Nyquist plot.

Table S2. Comparison of AEMWE performances using the non-noble metal-based HER

| Reference number | Cathode material                                                                | Cathode loading [mg cm <sup>-2</sup> ] | Membrane        | Anode material                                                                  | Anode loading [mg cm <sup>-2</sup> ] | Temperature [°C] | Cell voltage [V] | Current density [A cm <sup>-2</sup> ] |
|------------------|---------------------------------------------------------------------------------|----------------------------------------|-----------------|---------------------------------------------------------------------------------|--------------------------------------|------------------|------------------|---------------------------------------|
| <b>This work</b> | <b>NiFeO<sub>x</sub></b>                                                        | <b>2</b>                               | <b>FAA-3-50</b> | <b>NiFe</b>                                                                     | <b>1</b>                             | <b>70</b>        | <b>2.05</b>      | <b>1480</b>                           |
| 44               | Ni <sub>12</sub> P <sub>5</sub> Ni <sub>3</sub> (PO <sub>4</sub> ) <sub>2</sub> | 3                                      | YAB             | Ni <sub>12</sub> P <sub>5</sub> Ni <sub>3</sub> (PO <sub>4</sub> ) <sub>2</sub> | 3                                    | 50               | 2.05             | 650                                   |
| 46               | Ni                                                                              | 0.18                                   | FAA-3-50        | CuCoO                                                                           | 0.4                                  | 40               | 2.05             | 75                                    |
| 47               | Ni                                                                              | 1.45                                   | FAA-3-50        | Ni                                                                              | 1.45                                 | 40               | 2.05             | 60                                    |
| 45               | NiCoS                                                                           | -                                      | Nafion          | IrO <sub>2</sub>                                                                | -                                    | 50               | 2.05             | 610                                   |
| 48               | NiCoO-NiCo/C                                                                    | 1.5                                    | X37-50          | CuCoO                                                                           | 30                                   | 50               | 1.85             | 504                                   |
| 49               | NiCu                                                                            | 5                                      | Fumapem-3-pe-30 | Ir                                                                              | 3                                    | 50               | 1.9              | 1350                                  |
| 50               | Ni                                                                              | 0.38                                   | FAA-3-50        | CuCoO                                                                           | 0.4                                  | -                | 2.05             | 110                                   |
| 51               | NiFeCo-P                                                                        | -                                      | X37-50          | NiFeO                                                                           | -                                    | 50               | 1.72             | 500                                   |
| 52               | NiMnO                                                                           | 1                                      | Fumapem-3-pe-30 | NiCoFe                                                                          | 3                                    | 50               | 2.0              | 1150                                  |
| 53               | Ni/(CeO <sub>2</sub> -La <sub>2</sub> O <sub>3</sub> )/C                        | 2.7                                    | A201            | ACTA 3030                                                                       | -                                    | -                | 1.9              | 300                                   |
| 54               | Ni/(CeO <sub>2</sub> -La <sub>2</sub> O <sub>3</sub> )/C                        | 7.4                                    | A201            | ACTA 3030                                                                       | 30                                   | 60               | 1.9              | 350                                   |

catalysts reported in the literature<sup>44-54</sup> and in this work.

Table S3. Comparison of AEMWE performances using the noble metal-based HER catalysts

| Reference number | Cathode material  | Cathode loading [mg cm <sup>-2</sup> ] | Membrane        | Anode material   | Anode loading [mg cm <sup>-2</sup> ] | Temperature [°C] | Cell voltage [V] | Current density [A cm <sup>-2</sup> ] |
|------------------|-------------------|----------------------------------------|-----------------|------------------|--------------------------------------|------------------|------------------|---------------------------------------|
| <b>This work</b> | <b>Pt</b>         | <b>2</b>                               | <b>FAA-3-50</b> | <b>NiFe</b>      | <b>1</b>                             | <b>70</b>        | <b>2.05</b>      | <b>4000</b>                           |
| 55               | PtNi/CP           | 0.001856                               | A201            | Ni/CP            | 0.00851                              | 50               | 1.9              | 250                                   |
| 57               | RuSe <sub>2</sub> | 2                                      | FAA-3-50        | IrO <sub>2</sub> | 2.5                                  | 80               | 1.8              | 730                                   |
| 56               | TNTA+Pd           | 1.7                                    | A201            | IrO <sub>2</sub> | 5                                    | 60               | 2.05             | 1000                                  |
| 58               | Pt/C              | -                                      | A201            | IrO <sub>2</sub> | -                                    | 50               | 1.8              | 1030                                  |
| 59               | Pt/C              | 0.4                                    | FAA-3-50        | IrO <sub>2</sub> | 2                                    | 70               | 2.05             | 2400                                  |
| 60               | Pt/C              | 1                                      | FAA-3-50        | IrO <sub>2</sub> | 0.5                                  | 80               | 1.73             | 1000                                  |
| 61               | Pt/C              | 1                                      |                 | CuCoO            |                                      | 40               | 1.9              | 2250                                  |
| 62               | Pt/C              | 1                                      |                 | CuCoO            | 0.2                                  | 45               | 1.9              | 1900                                  |
| 63               | Pt/C              | 1                                      | X37-50          | COO-NP           | 3                                    | 50               | 2.0              | 1150                                  |
| 7                | Pt/C              | 1                                      | X37-50          | NiFeOx           |                                      | -                | 1.9              | 2000                                  |
| 64               | Pt/C              | -                                      | X37-50          | NiFeV            | 3.95                                 | 50               | 1.9              | 2850                                  |

reported in the literature<sup>7,55-64</sup> and in this work.

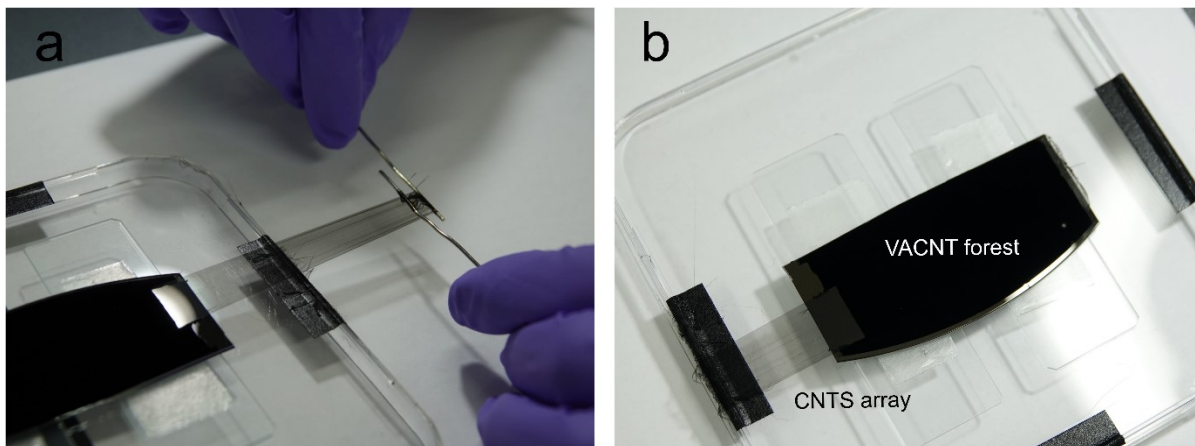

**Figure S1.** Photograph of process: (a) drawing carbon nanotube sheet (CNTS) from the vertically aligned carbon nanotube (VACNT) forest and (b) resulting single CNTS array.

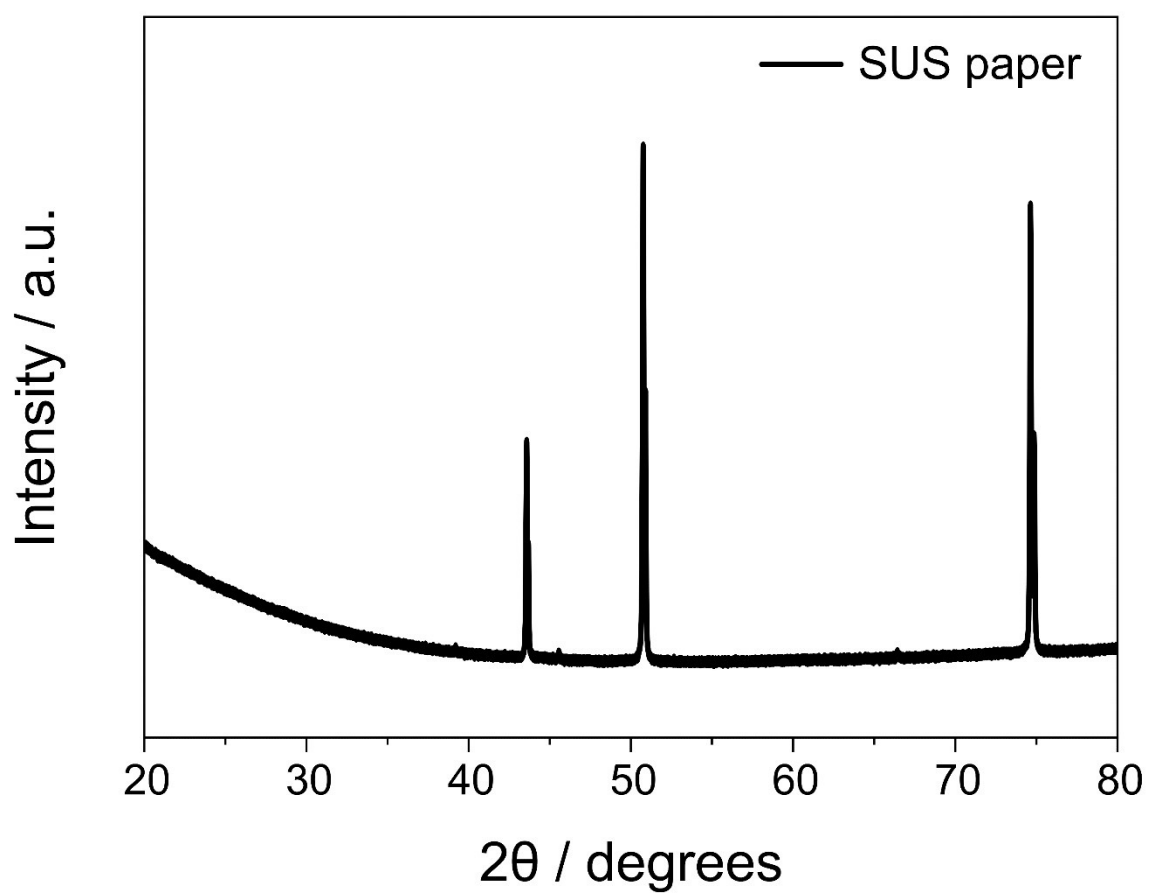

**Figure S2.** X-ray diffraction (XRD) patterns of SUS paper.

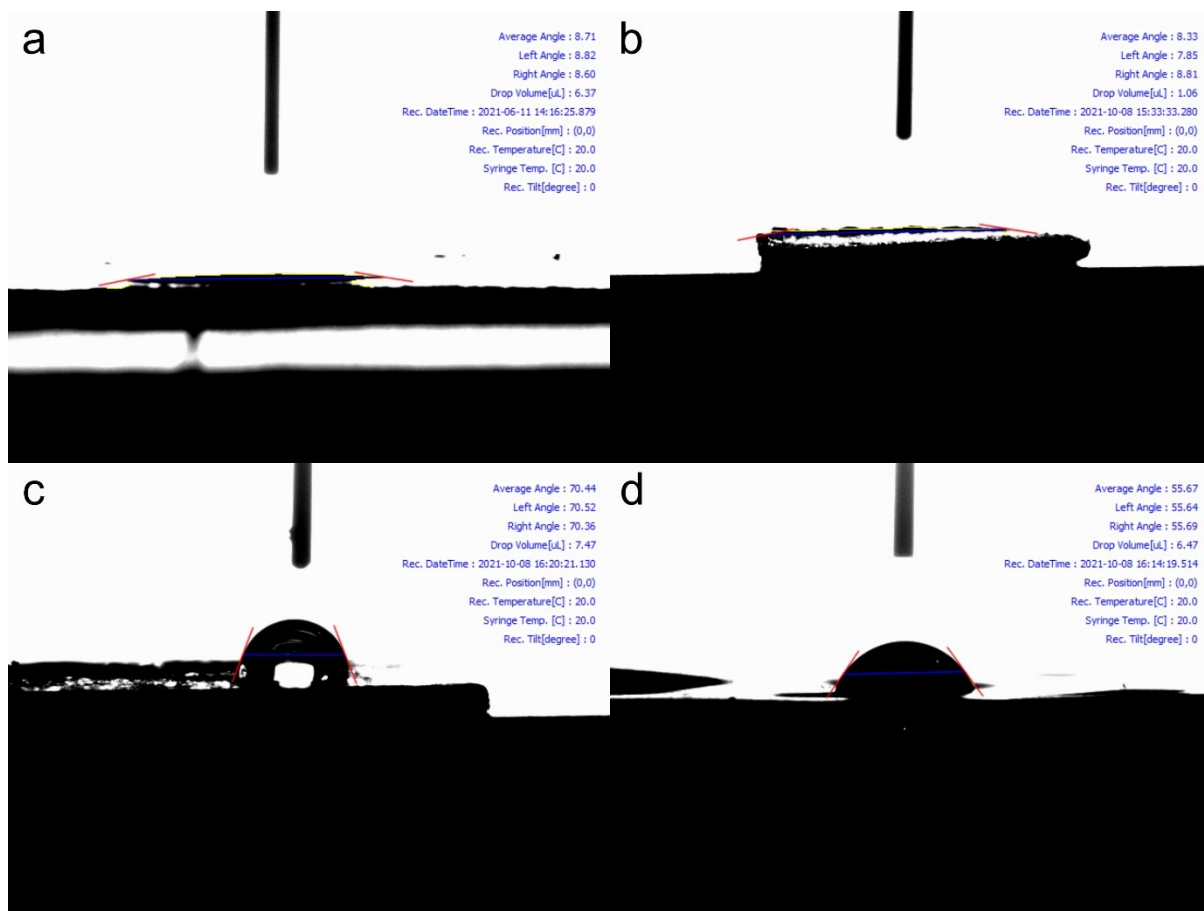

**Figure S3.** Contact angles of four electrodes: (a) NiFeO<sub>x</sub>\_CNTS, (b) NiFeO<sub>x</sub>\_NP, (c) Pt\_CNTS, and (d) Pt\_NP.

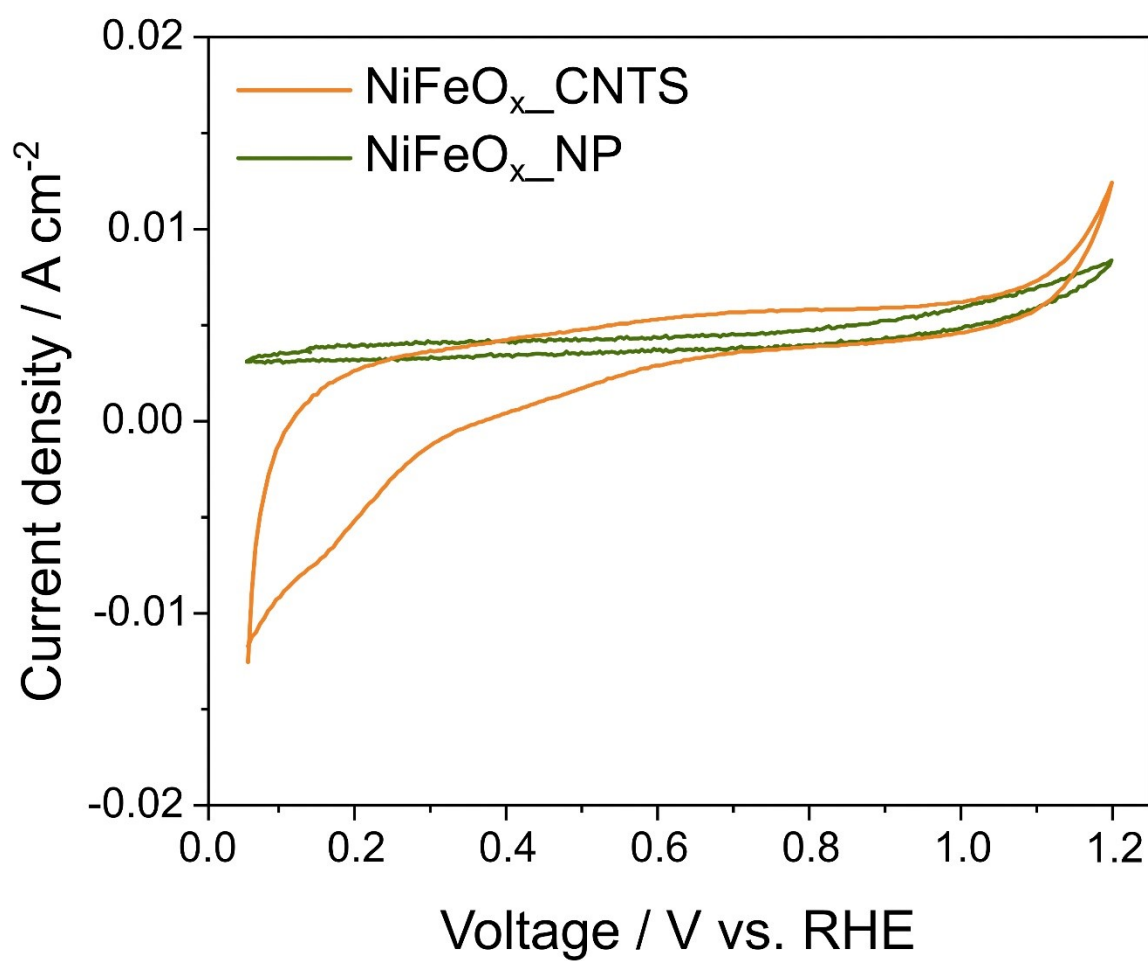

**Figure S4.** Cyclic voltammograms of NiFeO<sub>x</sub>\_CNTS and NiFeO<sub>x</sub>\_NP.



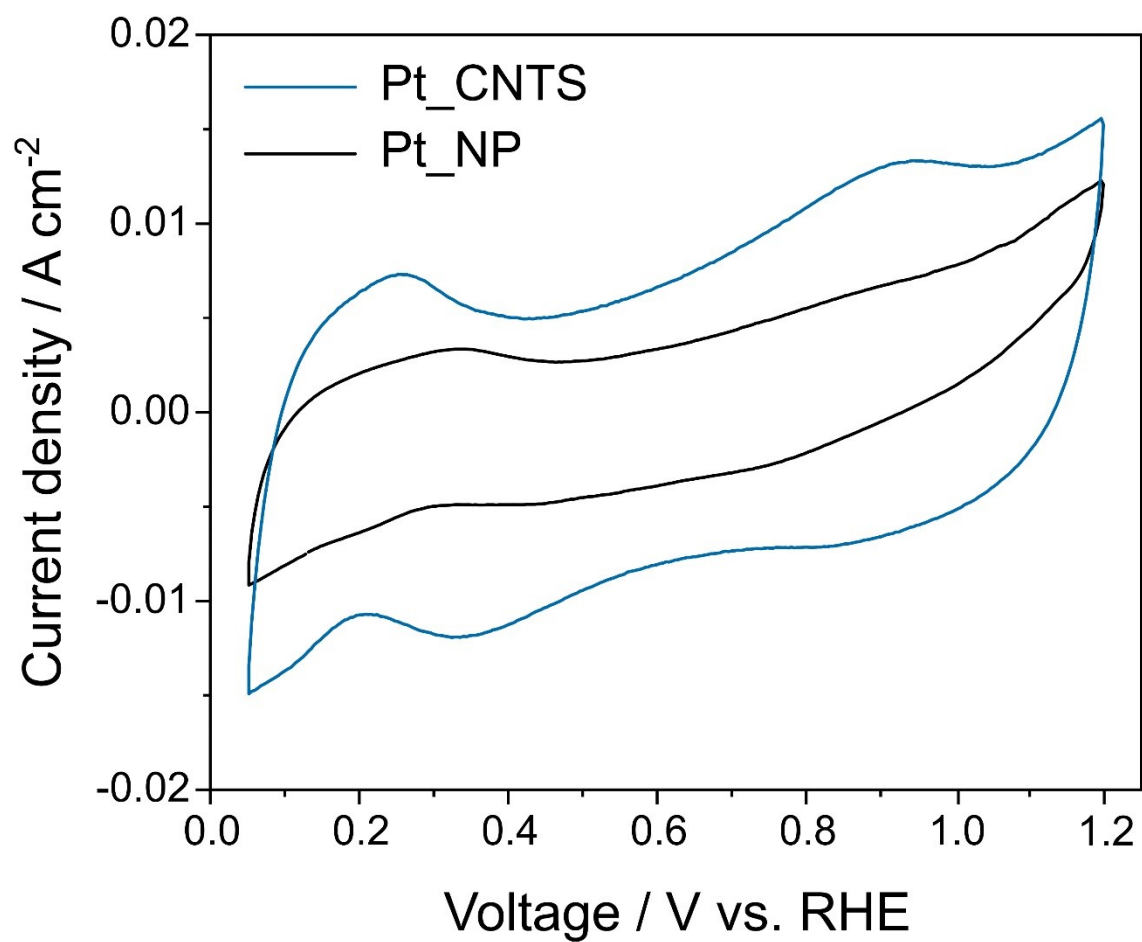

**Figure S5.** Cyclic voltammograms of Pt\_CNTSs and Pt\_NPs.

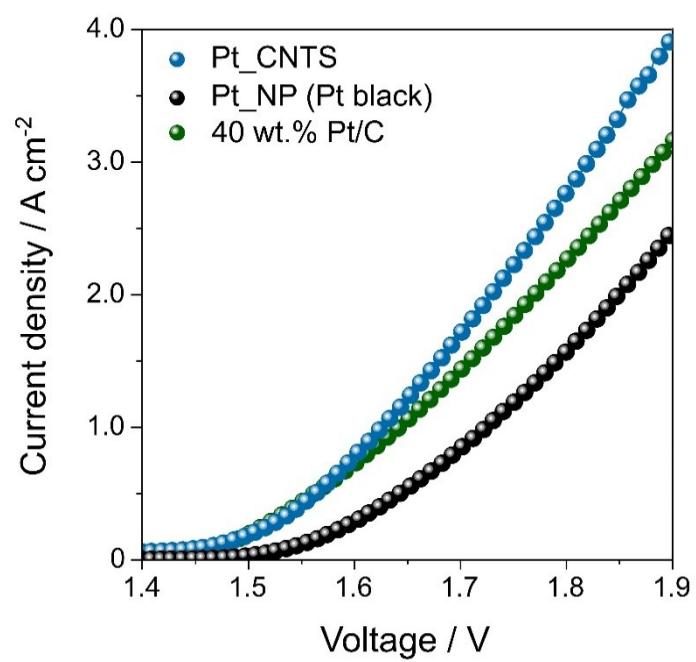

**Figure S6.** Polarization curves for AEMWE using Pt\_CNTS, Pt\_NP (Pt black), and 40 wt.% Pt/C.

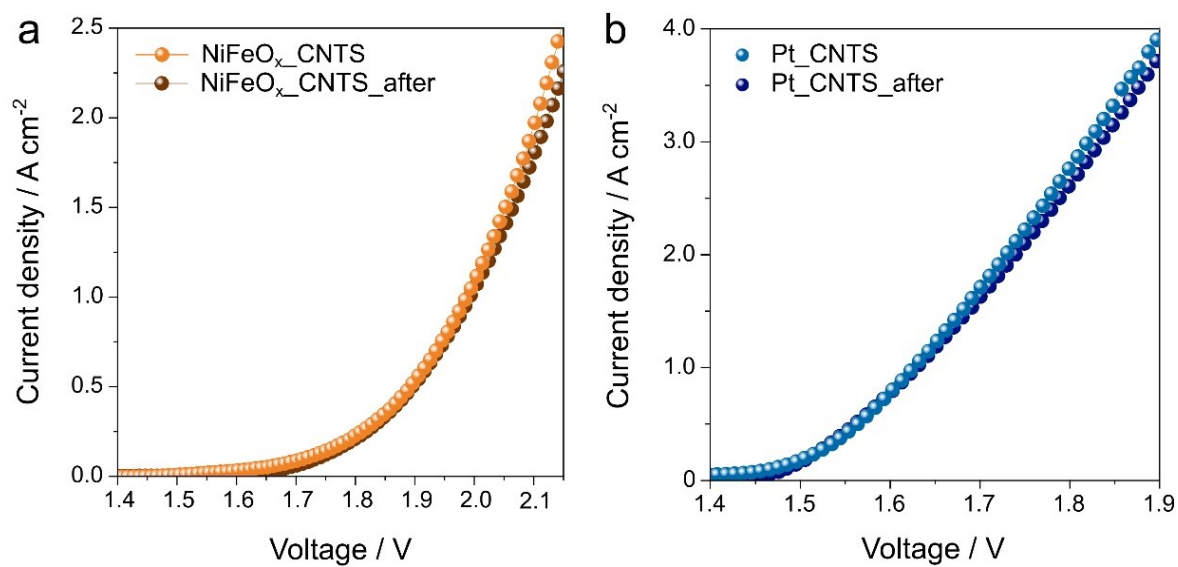

**Figure S7.** Comparison of polarization curves of two AEMWEs ((a) NiFeO<sub>x</sub>\_CNTS and (b) Pt\_CNTS) before and after the durability test.
